# The American Journal of Psychiatry

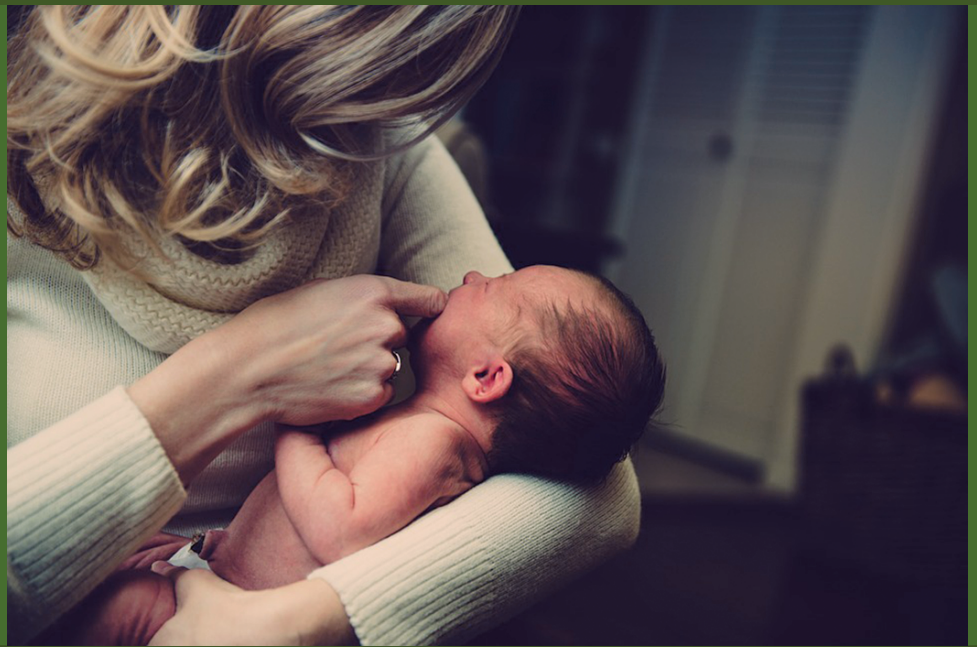

Risk of Postpartum Relapse in Bipolar Disorder and Postpartum  
Psychosis: A Systematic Review and Meta-Analysis

Defense Mechanisms of Pregnant Mothers Predict Attachment Security,  
Social-Emotional Competence, and Behavior Problems in Their Toddlers

The Roles of Maternal Depression, Serotonin Reuptake Inhibitor  
Treatment, and Concomitant Benzodiazepine Use on Infant  
Neurobehavioral Functioning Over the First Postnatal Month

Heritability of Perinatal Depression and Genetic Overlap  
With Nonperinatal Depression
