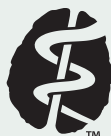

# The American Journal of Psychiatry

Official Journal of the American Psychiatric Association

## Officers 2015–2016

### President

Renée L. Binder, M.D.

### President-Elect

Maria A. Oquendo, M.D.

### Treasurer

Frank W. Brown, M.D.

### Secretary

Altha J. Stewart, M.D.

### Assembly

#### Speaker

Glenn A. Martin, M.D.

#### Speaker-Elect

Daniel J. Anzia, M.D.

#### Recorder

Theresa Miskimen, M.D.

### Office of the CEO and Medical Director

#### CEO and Medical Director

Saul Levin, M.D., M.P.A.

### Board of Trustees

Jeffrey Akaka, M.D.

Lama Bazzi, M.D.

R. Scott Benson, M.D.

Ronald M. Burd, M.D.

Stella Cai, M.D.

Brian Crowley, M.D.

Anita S. Everett, M.D.

Jeffrey L. Geller, M.D., M.P.H.

Dilip V. Jeste, M.D.

Jeffrey A. Lieberman, M.D.

Vivian B. Pender, M.D.

Gail E. Robinson, M.D.

Ravi N. Shah, M.D.

Paul Summergrad, M.D.

Melinda Young, M.D.

## Editorial Board

### Editor

Robert Freedman, M.D.

### Deputy Editors

David A. Lewis, M.D.

Robert Michels, M.D.

Daniel S. Pine, M.D.

A. John Rush, M.D.

Susan K. Schultz, M.D.

Carol A. Tamminga, M.D.

### Associate Editors

Alan Brown, M.D., M.P.H.

Tyrone Cannon, Ph.D.

Benjamin G. Druss, M.D., M.P.H.

Graham J. Emslie, M.D.

Daniel C. Javitt, M.D.

Bankole Johnson, M.D.

Ellen Leibenluft, M.D.

Joan L. Luby, M.D.

Constantine G. Lyketsos, M.D., M.H.S.

Helen S. Mayberg, M.D., F.R.C.P.C.

Barbara Milrod, M.D.

Terrie E. Moffitt, Ph.D.

Anita Thapar, M.B.B.Ch., F.R.C.Psych.,

Ph.D., F.Med.Sci.

Mauricio Tohen, M.D., Dr.PH., M.B.A.

Eduard Vieta, M.D., Ph.D.

Katherine L. Wisner, M.D., M.S.

Xin Yu, M.D.

### Editor Emerita

Nancy C. Andreasen, M.D., Ph.D.

### Former Editors

Amariah Brigham, M.D., 1844–1849

T. Romeyn Beck, M.D., 1849–1854

John P. Gray, M.D., 1854–1886

G. Alder Blumer, M.D., 1886–1894

Richard Dewey, M.D., 1894–1897

Henry M. Hurd, M.D., 1897–1904

Edward N. Brush, M.D., 1904–1931

Clarence B. Farrar, M.D., 1931–1965

Francis J. Braceland, M.D., 1965–1978

John C. Nemiah, M.D., 1978–1993

### Editorial Staff

#### Executive Editor

Michael D. Roy

#### Senior Editors

John J. Guardiano, Ph.D.

Jane Weaver

#### Production Manager

Susan Westrate

#### Assistant Editor

Angela Moore

#### Online Content Manager

Michael Pogachar

#### Editorial Support Services Manager

Heidi Koch

#### Editorial Assistant

Linda LaCour

#### Editorial Assistant/ Permissions Coordinator

Elizabeth Stern

#### Assistants to the Editors

Lois Lilienthal

Laura English

Rachel Hogg

Russell A. Scholl

### Publisher

Rebecca D. Rinehart

# The Residents' JOURNAL

## The American Journal of Psychiatry Residents' Journal

January 2016

Volume 11

Issue 1

### Inside

- Monitoring the Meeting: Resident Takeaways From the October 2015 APA Mental Health Services Conference**  
**I. Racial/Ethnic and Sexual/Gender Minority Training Experiences in Psychiatry: Past, Present, and Future Directions to Improving Training Climate**  
Roberto E. Montenegro, M.D., Ph.D., and Hector Colon-Rivera, M.D.  
*Elucidating modern forms of subtle and unintentional exclusion based on social differences.*
- Sexual Orientation, Gender Identity, and Sex Development Competencies in Medical Education: Implications for Public Psychiatry**  
Brian Hurley, M.D., M.B.A., and Kristen Eckstrand, M.D., Ph.D.  
*Discussing competency-based medical education addressing sexual orientation, gender identity, and sex development, including defining terminology for a diverse group of patients.*
- Do You Have Access to Guns?**  
Tanuja Gandhi, M.D.  
*Fostering discussion on gun awareness in a motivational interview-based approach.*
- Pharmacological Advances in the Treatment of Schizophrenia**  
Javier Ballester, M.D., and Brian A. Frankel, M.D.  
*Examining antipsychotic drugs currently in development, with focus on the dopamine, glutamate, acetylcholine, and serotonin systems, as well as hormones.*
- Paranoid Personality Disorder**  
Amy Vyas, M.D., and Madiha Khan, M.D.  
*Analyzing characteristics of paranoid personality disorder in a 65-year-old male patient with no prior psychiatric history.*
- Naltrexone for Severe Eye-Gouging in Down Syndrome**  
Aaron J. Hauptman, M.D.  
*Assessing severe self-injurious behavior in a middle-aged, intellectually disabled woman, with discussion of the efficacy of naltrexone for treatment in adults.*
- The Unseen Wounds of War**  
Anita Kumar Chang, D.O.  
*Commentary on improved recognition and understanding of posttraumatic stress disorder in veterans.*
- Call for Applications to Join the 2016 Editorial Board**
- Residents' Resources**

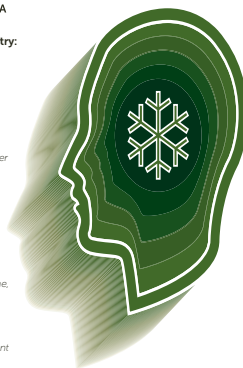

#### Editor-in-Chief

Rajiv Radhakrishnan, M.B.B.S., M.D.

#### Senior Deputy Editor

Katherine Pier, M.D.

#### Deputy Editor

Hun Millard, M.D., M.A.

#### Associate Editors

Rafik Sidaros, M.B.B.Ch.  
Janet Charoensook, M.D.

#### Staff Editor

Angela Moore

#### Editors Emeriti

Sarah B. Johnson, M.D.  
Molly McVoy, M.D.  
Joseph M. Cerimele, M.D.  
Sarah M. Fayad, M.D.  
Monifa Seawell, M.D.  
Misty Richards, M.D., M.S.

**Editor-in-Chief**  
Rajiv Radhakrishnan, M.B.B.S., M.D.

**Senior Deputy Editor**  
Katherine Pier, M.D.

**Deputy Editor**  
Hun Millard, M.D., M.A.

**Associate Editors**  
Rafik Sidaros, M.B.B.Ch.  
Janet Charoensook, M.D.

*The Residents' Journal*, the largest and most robust resident-led journal in the house of medicine, is an e-publication that serves as a forum to share your ideas and experiences in training, clinical practice, research, and careers with your colleagues.

To submit a manuscript, please visit [mc.manuscriptcentral.com/appi-ajp](http://mc.manuscriptcentral.com/appi-ajp) and select a manuscript type for AJP Residents' Journal. You may submit a commentary (500 words), book review (500 words), history of psychiatry (500 words), clinical case conference (1,250 words), review article (1,500 words), treatment in psychiatry article (1,500 words), research article (1,250 words), drug review (1,500 words), or letter to the editor (250 words).

*The Residents' Journal* is sent free-of-charge to all psychiatry residents. Anyone interested in being included on the distribution list should contact Angela Moore, *The Residents' Journal* staff editor at [ajp@psych.org](mailto:ajp@psych.org) with "Subscribe to Residents' Journal" in the subject line.

To access the complete Residents' Journal archives, visit [ajp.psychiatryonline.org/residents\\_journal](http://ajp.psychiatryonline.org/residents_journal)

# THE AMERICAN PSYCHIATRIC ASSOCIATION

1000 Wilson Blvd., Suite 1825, Arlington, VA 22209-3901  
(888) 357-7924 (toll-free inside the U.S. and Canada) / (703) 907-7300  
web site: [www.psychiatry.org](http://www.psychiatry.org) • e-mail: [apa@psych.org](mailto:apa@psych.org)

## Chairpersons of Councils, Committees, and Task Forces

### Standing Committees

|                             |                                |
|-----------------------------|--------------------------------|
| <b>Bylaws</b>               | Rebecca W. Brendel, M.D., J.D. |
| <b>Elections</b>            | Barry K. Herman, M.D.          |
| <b>Ethics</b>               | Ezra Griffith, M.D.            |
| <b>Finance and Budget</b>   | Alan F. Schatzberg, M.D.       |
| <i>Audit</i>                | Frank W. Brown, M.D.           |
| <i>Investment Oversight</i> | David Fassler, M.D.            |
| <b>Joint Reference</b>      | Maria A. Oquendo, M.D.         |
| <b>Membership</b>           | Rahn K. Bailey, M.D.           |
| <b>Nominating</b>           | Paul Summergrad, M.D.          |
| <b>Tellers</b>              | Catherine May, M.D.            |

### Councils

#### Council on Addiction Psychiatry

Frances R. Levin, M.D.

#### Council on Advocacy and Government Relations

Barry B. Perlman, M.D.

*Advocacy and Litigation Funding*

Jeffrey Akaka, M.D.

#### Council on Children, Adolescents, and Their Families

Joseph V. Penn, M.D.

*Agnes Purcell McGavin Award*

Robert Lee Hendren, M.D.

*Blanche F. Ittleson Research Award*

Michael Houston, M.D.

#### Council on Communications

Arshya Vahabzadeh, M.D.

#### Council on Geriatric Psychiatry

Robert P. Roca, M.D.

#### Council on Healthcare Systems and Financing

Harsh K. Trivedi, M.D.

*Reimbursement for Psychiatric Care*

Bruce J. Schwartz, M.D.

*RBRVS, Codes and Reimbursement*

Gregory G. Harris, M.D.

#### Council on International Psychiatry

Michelle Riba, M.D.

#### Council on Medical Education and Lifelong Learning

Richard F. Summers, M.D.

*American Leadership Fellowship Selection*

Leah J. Dickstein, M.D., M.A.

*APA Public Psychiatry Fellowship Selection Committee*

Derri Shtasel, M.D.

*APA/SAMHSA Minority Fellowship Selection and Advisory*

Roberto Lewis-Fernandez, M.D.

*Scientific Program*

Steven Koh, M.D.

*Vestermark Award Committee*

Jonathan F. Borus, M.D.

#### Council on Minority Mental Health and Health Disparities

Christina V. Mangurian, M.D.

#### Council on Psychiatry And Law

Steven K. Hoge, M.D.

*Isaac Ray/Human Rights Award*

Liza Hannah Gold, M.D.

*Judicial Action*

Marvin S. Swartz, M.D.

*Manfred S. Guttmacher Award*

David A. Lowenthal, M.D.

#### Council on Psychosomatic Medicine

##### (Consultation Liaison Psychiatry)

David F. Gitlin, M.D.

#### Council on Quality Care

Grayson Norquist, M.D.

*Mental Health Information Technology*

Steven Roy Daviss, M.D.

*Performance Measures*

Karen Pierce, M.D.

*Steering Committee on Practice Guidelines*

Michael J. Vergare, M.D.

#### Council on Research

Dwight L. Evans, M.D.

*Psychiatric Dimensions of Disasters*

Robert J. Ursano, M.D.

*Research Awards*

Matthew W. State, M.D.

# There's So Much More to AJP Than Meets the Page!

Visit *The American Journal of Psychiatry's* website on PsychiatryOnline for the following features!

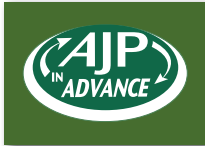

## AJP in Advance

The very latest research advances!

At **AJP in Advance**, you can discover the following before their appearance in print:

### Neural Correlates of the Propensity for Retaliatory Behavior in Youths With Disruptive Behavior Disorders

Youth with disruptive behavior disorders (DBD) and low levels of callous-unemotional traits show greater increases in activation of neural threat circuitry when punishing others, relative to healthy youths and to patients with DBD and high levels of callous-unemotional traits. They also have dysfunctional down-regulation of the ventromedial prefrontal cortex during retaliation.

### Reproductive Safety of Second-Generation Antipsychotics: Current Data From the Massachusetts General Hospital National Pregnancy Registry for Atypical Antipsychotics

Registry data on 303 pregnant women indicate that the rate of major malformations among infants exposed to second-generation antipsychotics (1.4%) is not significantly higher than the rate among unexposed infants of mothers with psychiatric illness (1.1%).

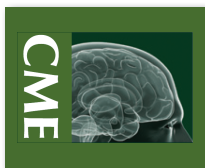

## AJP CME

Three articles in this issue form the basis of a short course with questions that can be answered for up to 1 *AMA PRA Category 1 Credit™* each by visiting <http://psychiatryonline.org/cme> and clicking on the "American Journal of Psychiatry" tab. CME credit is issued only **online**, and a paid subscription to AJP CME course program is required. This month's courses appear on pages 201–204.

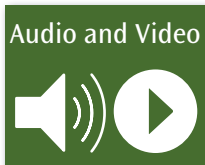

## Have You Heard?

With AJP Audio you can listen to highlights of this issue. This month, Executive Editor Michael Roy discusses the risk of postpartum relapse in bipolar disorder and postpartum psychosis, the relation of pregnant women's defense mechanisms to later behavior in their toddlers, sequential integration of pharmacotherapy and psychotherapy for depression, the dose-response relationship of SSRIs, the effectiveness of clozapine versus standard antipsychotic treatment for schizophrenia, and the relation of prenatal maternal depression, SSRIs, and benzodiazepines to infant neurobehavioral functioning.

Also, visit the online edition of this month's *Journal* to view a video of Deputy Editor Daniel S. Pine, M.D., presenting highlights from the issue.

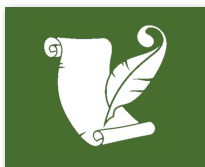

## Revisit the field's rich history!

### 50 years ago this month: Articles addressing sociocultural issues

The February 1966 issue contains articles addressing the mental health or assessment of specific groups—e.g., the unmarried, individuals who were adopted as children, "open biracial groups"—as well as more general articles on sociocultural issues, such as "Toward Sociocultural Flexibility in Resident Education" and "Cultural Exclusion, Character, and Illness."

### 25 years ago this month: Placebo response

In two separate articles, Frederic M. Quitkin et al. report findings on a variety of questions and hypotheses about early, abrupt response in placebo-controlled antidepressant trials, with the goal of better identifying and characterizing placebo response.
